# Supplementary material for: The Use of a Novel NanoLuc -Based Reporter Phage for the Detection of Escherichia coli O157:H7
Source: PubMed Central journal article supplement (PMC5021930; doi:10.1038/srep33235), 2016-09-14
Supplement: srep33235-s1.pdf [file srep33235-s1.pdf]

## Supplementary Information

for

### **The Use of a Novel NanoLuc -Based Reporter Phage for the Detection of *Escherichia coli* O157:H7**

Dandan Zhang<sup>1</sup>, Claudia P Coronel-Aguilera<sup>1</sup>, Patricia L Romero<sup>1</sup>, Lynda Perry<sup>1</sup>, Udit Minocha<sup>1</sup>, Carla Rosenfield<sup>2</sup>, Andrew G Gehring<sup>3</sup>, George C Paoli<sup>3</sup>, Arun K Bhunia<sup>1</sup> and Bruce Applegate<sup>1,2\*</sup>

<sup>1</sup>Department of Food Science, Purdue University, West Lafayette, IN 47907, USA

<sup>2</sup>Department of Biological Science, Purdue University, West Lafayette, IN 47907, USA

<sup>3</sup>Molecular Characterization of Foodborne Pathogens Research Unit, Eastern Regional Research Center, Agricultural Research Service, U.S. Department of Agriculture, Wyndmoor, PA 19038, USA

\*Email: [applegate@purdue.edu](mailto:applegate@purdue.edu)

**Supplementary Table S1.****Bacteriophage  $\Phi$ V10 specificity assays****Table S1a. *Escherichia coli* O157:H7 strains**

| <b>Bacterial isolate</b>         | <b>Provided by<sup>a</sup></b> | <b>Plaque formation<sup>b</sup></b> |
|----------------------------------|--------------------------------|-------------------------------------|
| <i>E. coli</i> O157:H7 204P      | D. Conner                      | +                                   |
| <i>E. coli</i> O157:H7 505B      | D. Conner                      | +                                   |
| <i>E. coli</i> O157:H7 SEA 13A70 | J. Johnson                     | +                                   |
| <i>E. coli</i> O157:H7 SEA 13A39 | J. Johnson                     | +                                   |
| <i>E. coli</i> O157:H7 EDL 933   | J. Johnson                     | +                                   |
| <i>E. coli</i> O157:H7 SEA 13A53 | J. Johnson                     | +                                   |
| <i>E. coli</i> O157:H7 SEA 13A44 | J. Johnson                     | +                                   |
| <i>E. coli</i> O157:H7 SEA 13A73 | J. Johnson                     | +                                   |
| <i>E. coli</i> O157:H7 O1        | A. Bhunia                      | +                                   |
| <i>E. coli</i> O157:H7 O2        | A. Bhunia                      | +                                   |
| <i>E. coli</i> O157:H7 O3        | A. Bhunia                      | +                                   |
| <i>E. coli</i> O157:H7 O4        | A. Bhunia                      | +                                   |
| <i>E. coli</i> O157:H7 O5        | A. Bhunia                      | +                                   |
| <i>E. coli</i> O157:H7 O6        | A. Bhunia                      | +                                   |
| <i>E. coli</i> O157:H7 O7        | A. Bhunia                      | +                                   |
| <i>E. coli</i> O157:H7 O9        | A. Bhunia                      | +                                   |
| <i>E. coli</i> O157:H7 O10       | A. Bhunia                      | +                                   |
| <i>E. coli</i> O157:H7 O11       | A. Bhunia                      | +                                   |
| <i>E. coli</i> O157:H7 O12       | A. Bhunia                      | +                                   |
| <i>E. coli</i> O157:H7 O13       | A. Bhunia                      | +                                   |
| <i>E. coli</i> O157:H7 O14       | A. Bhunia                      | +                                   |
| <i>E. coli</i> O157:H7 P5        | A. Bhunia                      | +                                   |
| <i>E. coli</i> O157:H7 P6        | A. Bhunia                      | +                                   |
| <i>E. coli</i> O157:H7 Q3        | A. Bhunia                      | +                                   |
| <i>E. coli</i> O157:H7 Q4        | A. Bhunia                      | +                                   |
| <i>E. coli</i> O157:H7 T3        | A. Bhunia                      | +                                   |
| <i>E. coli</i> O157:H7 T7        | A. Bhunia                      | +                                   |
| <i>E. coli</i> O157:H7 T8        | A. Bhunia                      | +                                   |
| <i>E. coli</i> O157:H7 T10       | A. Bhunia                      | +                                   |
| <i>E. coli</i> O157:H7 ATCC43890 | P. Fratamico                   | +                                   |
| <i>E. coli</i> O157:H7 380-94    | P. Fratamico                   | +                                   |
| <i>E. coli</i> O157:H7 SEA 13B88 | P. Fratamico                   | +                                   |

**Table S1a-Continued**

| <b>Bacterial isolate</b>     | <b>Provided by<sup>a</sup></b> | <b>Plaque formation<sup>b</sup></b> |
|------------------------------|--------------------------------|-------------------------------------|
| <i>E. coli</i> O157:H7 G5243 | A. Bhunia                      | +                                   |
| <i>E. coli</i> O157:H7 G5244 | A. Bhunia                      | +                                   |
| <i>E. coli</i> O157:H7 G5285 | A. Bhunia                      | +                                   |
| <i>E. coli</i> O157:H7 G5286 | A. Bhunia                      | +                                   |
| <i>E. coli</i> O157:H7 G5293 | A. Bhunia                      | +                                   |
| <i>E. coli</i> O157:H7 G5297 | A. Bhunia                      | +                                   |
| <i>E. coli</i> O157:H7 G5298 | A. Bhunia                      | +                                   |
| <i>E. coli</i> O157:H7 G5299 | A. Bhunia                      | +                                   |
| <i>E. coli</i> O157:H7 G5301 | A. Bhunia                      | +                                   |
| <i>E. coli</i> O157:H7 G5303 | A. Bhunia                      | +                                   |
| <i>E. coli</i> O157:H7 G5313 | A. Bhunia                      | +                                   |
| <i>E. coli</i> O157:H7 G5315 | A. Bhunia                      | +                                   |
| <i>E. coli</i> O157:H7 G5316 | A. Bhunia                      | +                                   |
| <i>E. coli</i> O157:H7 557   | R. Sanderson                   | +                                   |
| <i>E. coli</i> O157:H7 606   | R. Sanderson                   | +                                   |
| <i>E. coli</i> O157:H7 617   | R. Sanderson                   | +                                   |
| <i>E. coli</i> O157:H7 704   | R. Sanderson                   | +                                   |
| <i>E. coli</i> O157:H7 6318  | S. Weagant                     | +                                   |
| <i>E. coli</i> O157:H7 6319  | S. Weagant                     | +                                   |
| <i>E. coli</i> O157:H7 6321  | S. Weagant                     | +                                   |
| <i>E. coli</i> O157:H7 6322  | S. Weagant                     | +                                   |
| <i>E. coli</i> O157:H7 6323  | S. Weagant                     | +                                   |
| <i>E. coli</i> O157:H7 6324  | S. Weagant                     | +                                   |
| <i>E. coli</i> O157:H7 6325  | S. Weagant                     | +                                   |
| <i>E. coli</i> O157:H7 6326  | S. Weagant                     | +                                   |
| <i>E. coli</i> O157:H7 6327  | S. Weagant                     | +                                   |
| <i>E. coli</i> O157:H7 6328  | S. Weagant                     | +                                   |
| <i>E. coli</i> O157:H7 6329  | S. Weagant                     | +                                   |
| <i>E. coli</i> O157:H7 6330  | S. Weagant                     | +                                   |
| <i>E. coli</i> O157:H7 6331  | S. Weagant                     | +                                   |
| <i>E. coli</i> O157:H7 6332  | S. Weagant                     | +                                   |
| <i>E. coli</i> O157:H7 6333  | S. Weagant                     | +                                   |
| <i>E. coli</i> O157:H7 6334  | S. Weagant                     | +                                   |
| <i>E. coli</i> O157:H7 6335  | S. Weagant                     | +                                   |
| <i>E. coli</i> O157:H7 6336  | S. Weagant                     | +                                   |
| <i>E. coli</i> O157:H7 6337  | S. Weagant                     | +                                   |
| <i>E. coli</i> O157:H7 6338  | S. Weagant                     | +                                   |
| <i>E. coli</i> O157:H7 6339  | S. Weagant                     | +                                   |

**Table S1a-Continued**

| <b>Bacterial isolate</b>    | <b>Provided by<sup>a</sup></b> | <b>Plaque formation<sup>b</sup></b> |
|-----------------------------|--------------------------------|-------------------------------------|
| <i>E. coli</i> O157:H7 6341 | S. Weagant                     | +                                   |
| <i>E. coli</i> O157:H7 6342 | S. Weagant                     | +                                   |
| <i>E. coli</i> O157:H7 6343 | S. Weagant                     | +                                   |
| <i>E. coli</i> O157:H7 6344 | S. Weagant                     | +                                   |
| <i>E. coli</i> O157:H7 6345 | S. Weagant                     | +                                   |
| <i>E. coli</i> O157:H7 6346 | S. Weagant                     | +                                   |
| <i>E. coli</i> O157:H7 6347 | S. Weagant                     | +                                   |
| <i>E. coli</i> O157:H7 6348 | S. Weagant                     | +                                   |
| <i>E. coli</i> O157:H7 6349 | S. Weagant                     | +                                   |
| <i>E. coli</i> O157:H7 6350 | S. Weagant                     | +                                   |
| <i>E. coli</i> O157:H7 6351 | S. Weagant                     | +                                   |
| <i>E. coli</i> O157:H7 6352 | S. Weagant                     | +                                   |
| <i>E. coli</i> O157:H7 6353 | S. Weagant                     | +                                   |
| <i>E. coli</i> O157:H7 6354 | S. Weagant                     | +                                   |
| <i>E. coli</i> O157:H7 6355 | S. Weagant                     | +                                   |
| <i>E. coli</i> O157:H7 6356 | S. Weagant                     | +                                   |
| <i>E. coli</i> O157:H7 6357 | S. Weagant                     | +                                   |
| <i>E. coli</i> O157:H7 6358 | S. Weagant                     | +                                   |
| <i>E. coli</i> O157:H7 6359 | S. Weagant                     | +                                   |
| <i>E. coli</i> O157:H7 6360 | S. Weagant                     | +                                   |
| <i>E. coli</i> O157:H7 6361 | S. Weagant                     | +                                   |
| <i>E. coli</i> O157:H7 6362 | S. Weagant                     | +                                   |
| <i>E. coli</i> O157:H7 6363 | S. Weagant                     | +                                   |
| <i>E. coli</i> O157:H7 6364 | S. Weagant                     | +                                   |
| <i>E. coli</i> O157:H7 6380 | S. Weagant                     | +                                   |
| <i>E. coli</i> O157:H7 6391 | S. Weagant                     | +                                   |
| <i>E. coli</i> O157:H7 6393 | S. Weagant                     | +                                   |
| <i>E. coli</i> O157:H7 6394 | S. Weagant                     | +                                   |
| <i>E. coli</i> O157:H7 6395 | S. Weagant                     | +                                   |
| <i>E. coli</i> O157:H7 6396 | S. Weagant                     | +                                   |
| <i>E. coli</i> O157:H7 6397 | S. Weagant                     | +                                   |
| <i>E. coli</i> O157:H7 6398 | S. Weagant                     | +                                   |
| <i>E. coli</i> O157:H7 6413 | S. Weagant                     | +                                   |
| <i>E. coli</i> O157:H7 6414 | S. Weagant                     | +                                   |
| <i>E. coli</i> O157:H7 6415 | S. Weagant                     | +                                   |
| <i>E. coli</i> O157:H7 6416 | S. Weagant                     | +                                   |
| <i>E. coli</i> O157:H7 6417 | S. Weagant                     | +                                   |
| <i>E. coli</i> O157:H7 6418 | S. Weagant                     | +                                   |

**Table S1a-Continued**

| <b>Bacterial isolate</b>    | <b>Provided by<sup>a</sup></b> | <b>Plaque formation<sup>b</sup></b> |
|-----------------------------|--------------------------------|-------------------------------------|
| <i>E. coli</i> O157:H7 6447 | S. Weagant                     | +                                   |
| <i>E. coli</i> O157:H7 6452 | S. Weagant                     | +                                   |
| <i>E. coli</i> O157:H7 6455 | S. Weagant                     | +                                   |
| <i>E. coli</i> O157:H7 6456 | S. Weagant                     | +                                   |
| <i>E. coli</i> O157:H7 6458 | S. Weagant                     | +                                   |
| <i>E. coli</i> O157:H7 6459 | S. Weagant                     | +                                   |
| <i>E. coli</i> O157:H7 6460 | S. Weagant                     | +                                   |
| <i>E. coli</i> O157:H7 6461 | S. Weagant                     | +                                   |
| <i>E. coli</i> O157:H7 6462 | S. Weagant                     | +                                   |
| <i>E. coli</i> O157:H7 6463 | S. Weagant                     | +                                   |
| <i>E. coli</i> O157:H7 6464 | S. Weagant                     | +                                   |
| <i>E. coli</i> O157:H7 6465 | S. Weagant                     | +                                   |
| <i>E. coli</i> O157:H7 6466 | S. Weagant                     | +                                   |
| <i>E. coli</i> O157:H7 6467 | S. Weagant                     | +                                   |
| <i>E. coli</i> O157:H7 6468 | S. Weagant                     | +                                   |
| <i>E. coli</i> O157:H7 6469 | S. Weagant                     | +                                   |
| <i>E. coli</i> O157:H7 6470 | S. Weagant                     | +                                   |
| <i>E. coli</i> O157:H7 6471 | S. Weagant                     | +                                   |
| <i>E. coli</i> O157:H7 6472 | S. Weagant                     | +                                   |
| <i>E. coli</i> O157:H7 6473 | S. Weagant                     | +                                   |
| <i>E. coli</i> O157:H7 6474 | S. Weagant                     | +                                   |
| <i>E. coli</i> O157:H7 6475 | S. Weagant                     | +                                   |
| <i>E. coli</i> O157:H7 6476 | S. Weagant                     | +                                   |
| <i>E. coli</i> O157:H7 6477 | S. Weagant                     | +                                   |
| <i>E. coli</i> O157:H7 6478 | S. Weagant                     | +                                   |
| <i>E. coli</i> O157:H7 6479 | S. Weagant                     | +                                   |
| <i>E. coli</i> O157:H7 6480 | S. Weagant                     | +                                   |
| <i>E. coli</i> O157:H7 6481 | S. Weagant                     | +                                   |
| <i>E. coli</i> O157:H7 6482 | S. Weagant                     | +                                   |
| <i>E. coli</i> O157:H7 6483 | S. Weagant                     | +                                   |
| <i>E. coli</i> O157:H7 6484 | S. Weagant                     | +                                   |
| <i>E. coli</i> O157:H7 6485 | S. Weagant                     | +                                   |
| <i>E. coli</i> O157:H7 6486 | S. Weagant                     | +                                   |
| <i>E. coli</i> O157:H7 6487 | S. Weagant                     | +                                   |
| <i>E. coli</i> O157:H7 6488 | S. Weagant                     | +                                   |
| <i>E. coli</i> O157:H7 6489 | S. Weagant                     | +                                   |
| <i>E. coli</i> O157:H7 6490 | S. Weagant                     | +                                   |
| <i>E. coli</i> O157:H7 6491 | S. Weagant                     | +                                   |

**Table S1a-Continued**

| <b>Bacterial isolate</b>     | <b>Provided by<sup>a</sup></b> | <b>Plaque formation<sup>b</sup></b> |
|------------------------------|--------------------------------|-------------------------------------|
| <i>E. coli</i> O157:H7 6492  | S. Weagant                     | +                                   |
| <i>E. coli</i> O157:H7 6493  | S. Weagant                     | +                                   |
| <i>E. coli</i> O157:H7 6494  | S. Weagant                     | +                                   |
| <i>E. coli</i> O157:H7 6495  | S. Weagant                     | +                                   |
| <i>E. coli</i> O157:H7 6496  | S. Weagant                     | +                                   |
| <i>E. coli</i> O157:H7 6497  | S. Weagant                     | +                                   |
| <i>E. coli</i> O157:H7 6498  | S. Weagant                     | +                                   |
| <i>E. coli</i> O157:H7 6499  | S. Weagant                     | +                                   |
| <i>E. coli</i> O157:H7 13A17 | S. Weagant                     | +                                   |
| <i>E. coli</i> O157:H7 13A18 | S. Weagant                     | +                                   |
| <i>E. coli</i> O157:H7 13A19 | S. Weagant                     | +                                   |
| <i>E. coli</i> O157:H7 13A21 | S. Weagant                     | +                                   |
| <i>E. coli</i> O157:H7 13A22 | S. Weagant                     | +                                   |
| <i>E. coli</i> O157:H7 13A23 | S. Weagant                     | +                                   |
| <i>E. coli</i> O157:H7 13A24 | S. Weagant                     | +                                   |
| <i>E. coli</i> O157:H7 13A25 | S. Weagant                     | +                                   |
| <i>E. coli</i> O157:H7 13A26 | S. Weagant                     | +                                   |
| <i>E. coli</i> O157:H7 13A27 | S. Weagant                     | +                                   |
| <i>E. coli</i> O157:H7 13A28 | S. Weagant                     | +                                   |
| <i>E. coli</i> O157:H7 13A29 | S. Weagant                     | +                                   |
| <i>E. coli</i> O157:H7 13A30 | S. Weagant                     | +                                   |
| <i>E. coli</i> O157:H7 13A31 | S. Weagant                     | +                                   |
| <i>E. coli</i> O157:H7 13A32 | S. Weagant                     | +                                   |
| <i>E. coli</i> O157:H7 13A33 | S. Weagant                     | +                                   |
| <i>E. coli</i> O157:H7 13A34 | S. Weagant                     | +                                   |
| <i>E. coli</i> O157:H7 13A35 | S. Weagant                     | +                                   |
| <i>E. coli</i> O157:H7 13A36 | S. Weagant                     | +                                   |
| <i>E. coli</i> O157:H7 13A37 | S. Weagant                     | +                                   |
| <i>E. coli</i> O157:H7 13A38 | S. Weagant                     | +                                   |
| <i>E. coli</i> O157:H7 13A39 | S. Weagant                     | +                                   |
| <i>E. coli</i> O157:H7 13A40 | S. Weagant                     | +                                   |
| <i>E. coli</i> O157:H7 13A41 | S. Weagant                     | +                                   |
| <i>E. coli</i> O157:H7 13A42 | S. Weagant                     | +                                   |
| <i>E. coli</i> O157:H7 13A43 | S. Weagant                     | +                                   |
| <i>E. coli</i> O157:H7 13A44 | S. Weagant                     | +                                   |
| <i>E. coli</i> O157:H7 13A45 | S. Weagant                     | +                                   |
| <i>E. coli</i> O157:H7 13A46 | S. Weagant                     | +                                   |
| <i>E. coli</i> O157:H7 13A47 | S. Weagant                     | +                                   |

**Table S1a-Continued**

| <b>Bacterial isolate</b>     | <b>Provided by<sup>a</sup></b> | <b>Plaque formation<sup>b</sup></b> |
|------------------------------|--------------------------------|-------------------------------------|
| <i>E. coli</i> O157:H7 13A48 | S. Weagant                     | +                                   |
| <i>E. coli</i> O157:H7 13A49 | S. Weagant                     | +                                   |
| <i>E. coli</i> O157:H7 13A50 | S. Weagant                     | +                                   |
| <i>E. coli</i> O157:H7 13A51 | S. Weagant                     | +                                   |
| <i>E. coli</i> O157:H7 13A52 | S. Weagant                     | +                                   |
| <i>E. coli</i> O157:H7 13A53 | S. Weagant                     | +                                   |
| <i>E. coli</i> O157:H7 13A54 | S. Weagant                     | +                                   |
| <i>E. coli</i> O157:H7 13A55 | S. Weagant                     | +                                   |
| <i>E. coli</i> O157:H7 13A56 | S. Weagant                     | +                                   |
| <i>E. coli</i> O157:H7 13A57 | S. Weagant                     | +                                   |
| <i>E. coli</i> O157:H7 13A58 | S. Weagant                     | +                                   |
| <i>E. coli</i> O157:H7 13A59 | S. Weagant                     | +                                   |
| <i>E. coli</i> O157:H7 13A60 | S. Weagant                     | +                                   |
| <i>E. coli</i> O157:H7 13A61 | S. Weagant                     | +                                   |
| <i>E. coli</i> O157:H7 13A62 | S. Weagant                     | +                                   |
| <i>E. coli</i> O157:H7 13A63 | S. Weagant                     | +                                   |
| <i>E. coli</i> O157:H7 13A64 | S. Weagant                     | +                                   |
| <i>E. coli</i> O157:H7 13A65 | S. Weagant                     | +                                   |
| <i>E. coli</i> O157:H7 13A66 | S. Weagant                     | +                                   |
| <i>E. coli</i> O157:H7 13A69 | S. Weagant                     | +                                   |
| <i>E. coli</i> O157:H7 13A70 | S. Weagant                     | +                                   |
| <i>E. coli</i> O157:H7 13A88 | S. Weagant                     | +                                   |
| <i>E. coli</i> O157:H7 13A90 | S. Weagant                     | +                                   |
| <i>E. coli</i> O157:H7 13A91 | S. Weagant                     | +                                   |
| <i>E. coli</i> O157:H7 13A92 | S. Weagant                     | +                                   |
| <i>E. coli</i> O157:H7 13A93 | S. Weagant                     | +                                   |
| <i>E. coli</i> O157:H7 13A97 | S. Weagant                     | +                                   |
| <i>E. coli</i> O157:H7 13A98 | S. Weagant                     | +                                   |
| <i>E. coli</i> O157:H7 13A99 | S. Weagant                     | +                                   |
| <i>E. coli</i> O157:H7 13B12 | S. Weagant                     | +                                   |
| <i>E. coli</i> O157:H7 13B13 | S. Weagant                     | +                                   |
| <i>E. coli</i> O157:H7 13B14 | S. Weagant                     | +                                   |
| <i>E. coli</i> O157:H7 13B15 | S. Weagant                     | +                                   |
| <i>E. coli</i> O157:H7 13B17 | S. Weagant                     | +                                   |
| <i>E. coli</i> O157:H7 13B18 | S. Weagant                     | +                                   |
| <i>E. coli</i> O157:H7 13B19 | S. Weagant                     | +                                   |
| <i>E. coli</i> O157:H7 13B23 | S. Weagant                     | +                                   |
| <i>E. coli</i> O157:H7 13B25 | S. Weagant                     | +                                   |

**Table S1a-Continued**

| <b>Bacterial isolate</b>     | <b>Provided by<sup>a</sup></b> | <b>Plaque formation<sup>b</sup></b> |
|------------------------------|--------------------------------|-------------------------------------|
| <i>E. coli</i> O157:H7 13B26 | S. Weagant                     | +                                   |
| <i>E. coli</i> O157:H7 13B27 | S. Weagant                     | +                                   |
| <i>E. coli</i> O157:H7 13B28 | S. Weagant                     | +                                   |
| <i>E. coli</i> O157:H7 13B30 | S. Weagant                     | +                                   |
| <i>E. coli</i> O157:H7 13B31 | S. Weagant                     | +                                   |
| <i>E. coli</i> O157:H7 13B32 | S. Weagant                     | +                                   |
| <i>E. coli</i> O157:H7 13B33 | S. Weagant                     | +                                   |
| <i>E. coli</i> O157:H7 13B34 | S. Weagant                     | +                                   |
| <i>E. coli</i> O157:H7 13B35 | S. Weagant                     | +                                   |
| <i>E. coli</i> O157:H7 13B53 | S. Weagant                     | +                                   |
| <i>E. coli</i> O157:H7 13B54 | S. Weagant                     | +                                   |
| <i>E. coli</i> O157:H7 13B55 | S. Weagant                     | +                                   |
| <i>E. coli</i> O157:H7 13B56 | S. Weagant                     | +                                   |
| <i>E. coli</i> O157:H7 13B57 | S. Weagant                     | +                                   |
| <i>E. coli</i> O157:H7 13B58 | S. Weagant                     | +                                   |
| <i>E. coli</i> O157:H7 13B59 | S. Weagant                     | +                                   |
| <i>E. coli</i> O157:H7 13B60 | S. Weagant                     | +                                   |
| <i>E. coli</i> O157:H7 13B61 | S. Weagant                     | +                                   |
| <i>E. coli</i> O157:H7 13B62 | S. Weagant                     | +                                   |
| <i>E. coli</i> O157:H7 13B63 | S. Weagant                     | +                                   |
| <i>E. coli</i> O157:H7 13B64 | S. Weagant                     | +                                   |
| <i>E. coli</i> O157:H7 13B65 | S. Weagant                     | +                                   |
| <i>E. coli</i> O157:H7 13B66 | S. Weagant                     | +                                   |
| <i>E. coli</i> O157:H7 13B69 | S. Weagant                     | +                                   |
| <i>E. coli</i> O157:H7 13B70 | S. Weagant                     | +                                   |
| <i>E. coli</i> O157:H7 13B71 | S. Weagant                     | +                                   |
| <i>E. coli</i> O157:H7 13B72 | S. Weagant                     | +                                   |
| <i>E. coli</i> O157:H7 13B73 | S. Weagant                     | +                                   |
| <i>E. coli</i> O157:H7 13B74 | S. Weagant                     | +                                   |
| <i>E. coli</i> O157:H7 13B75 | S. Weagant                     | +                                   |
| <i>E. coli</i> O157:H7 13B76 | S. Weagant                     | +                                   |
| <i>E. coli</i> O157:H7 13B77 | S. Weagant                     | +                                   |
| <i>E. coli</i> O157:H7 13B78 | S. Weagant                     | +                                   |
| <i>E. coli</i> O157:H7 13B79 | S. Weagant                     | +                                   |
| <i>E. coli</i> O157:H7 13B80 | S. Weagant                     | +                                   |
| <i>E. coli</i> O157:H7 13B83 | S. Weagant                     | +                                   |
| <i>E. coli</i> O157:H7 13B84 | S. Weagant                     | +                                   |
| <i>E. coli</i> O157:H7 13B85 | S. Weagant                     | +                                   |



**Table S1a-Continued**

| <b>Bacterial isolate</b>         | <b>Provided by<sup>a</sup></b> | <b>Plaque formation<sup>b</sup></b> |
|----------------------------------|--------------------------------|-------------------------------------|
| <i>E. coli</i> O157:H7 13B86     | S. Weagant                     | +                                   |
| <i>E. coli</i> O157:H7 13B88     | S. Weagant                     | +                                   |
| <i>E. coli</i> O157:H7 13B89     | S. Weagant                     | +                                   |
| <i>E. coli</i> O157:H7 13B91     | S. Weagant                     | +                                   |
| <i>E. coli</i> O157:H7 13B92     | S. Weagant                     | +                                   |
| <i>E. coli</i> O157:H7 13B93     | S. Weagant                     | +                                   |
| <i>E. coli</i> O157:H7 13B94     | S. Weagant                     | +                                   |
| <i>E. coli</i> O157:H7 N009-6-1  | NVSL                           | +                                   |
| <i>E. coli</i> O157:H7 N045-1-6  | NVSL                           | +                                   |
| <i>E. coli</i> O157:H7 N192-5-1  | NVSL                           | +                                   |
| <i>E. coli</i> O157:H7 N317-3-1  | NVSL                           | +                                   |
| <i>E. coli</i> O157:H7 N336-2-2  | NVSL                           | +                                   |
| <i>E. coli</i> O157:H7 N336-4-1  | NVSL                           | +                                   |
| <i>E. coli</i> O157:H7 N396-2-2  | NVSL                           | +                                   |
| <i>E. coli</i> O157:H7 N404-5-1  | NVSL                           | +                                   |
| <i>E. coli</i> O157:H7 N931-5-1  | NVSL                           | +                                   |
| <i>E. coli</i> O157:H7 N1014-7-1 | NVSL                           | +                                   |
| <i>E. coli</i> O157:H7 N1014-8-1 | NVSL                           | +                                   |
| <i>E. coli</i> O157:H7 N1014-9-1 | NVSL                           | +                                   |
| <i>E. coli</i> O157:H7 5906      | A. Bhunia                      | +                                   |
| <i>E. coli</i> O157:H7 480       | A. Bhunia                      | +                                   |

**Table S1b. Non-O157:H7 *Escherichia coli* strains**

| <b>Bacterial isolate</b>                  | <b>Provided by<sup>a</sup></b> | <b>Plaque formation<sup>b</sup></b> |
|-------------------------------------------|--------------------------------|-------------------------------------|
| <i>E. coli</i> O157:H <sup>-</sup> 493-89 | P. Feng                        | -                                   |
| <i>E. coli</i> O111:H8 HSC 27             | R. Johnson                     | -                                   |
| <i>E. coli</i> O157:NM MF 7123A           | P. Fratamico                   | -                                   |
| <i>E. coli</i> O157:NM MF 13180-25        | P. Fratamico                   | -                                   |
| <i>E. coli</i> O157:H16 P11               | D. Thayer                      | -                                   |
| <i>E. coli</i> O5:NM 467                  | B. Blais                       | -                                   |
| <i>E. coli</i> O46:H38 HAL EC910004       | R. Johnson                     | -                                   |
| <i>E. coli</i> O91:H21 HSC 23             | R. Johnson                     | -                                   |
| <i>E. coli</i> O118:H30 HSC20             | R. Johnson                     | -                                   |
| <i>E. coli</i> OR:H7 HSC16                | R. Johnson                     | -                                   |
| <i>E. coli</i> O26:H11 1801-72            | P. Fratamico                   | -                                   |
| <i>E. coli</i> O26:H11 88.1457            | P. Fratamico                   | -                                   |
| <i>E. coli</i> O26:H11 2239-69            | P. Fratamico                   | -                                   |
| <i>E. coli</i> O113:H21 88.0632           | P. Fratamico                   | -                                   |
| <i>E. coli</i> O22:H8 90.0327             | P. Fratamico                   | -                                   |
| <i>E. coli</i> O29:NM ATCC 43892          | P. Fratamico                   | -                                   |
| <i>E. coli</i> O103:H2 87.1368            | P. Fratamico                   | -                                   |
| <i>E. coli</i> O5:NM 85.0587              | P. Fratamico                   | -                                   |
| <i>E. coli</i> O55:H7 1880                | A. Bhunia                      | -                                   |
| <i>E. coli</i> O26:H11 90.0109            | A. Bhunia                      | -                                   |
| <i>E. coli</i> 103:H11 04.3973            | A. Bhunia                      | -                                   |
| <i>E. coli</i> 103:H2 04.2446             | A. Bhunia                      | -                                   |
| <i>E. coli</i> O111:H-IBI-95              | A. Bhunia                      | -                                   |
| <i>E. coli</i> O111:H11 SH455             | A. Bhunia                      | -                                   |
| <i>E. coli</i> O145:H8 07865              | A. Bhunia                      | -                                   |
| <i>E. coli</i> O45:H2 SJ8                 | A. Bhunia                      | -                                   |
| <i>E. coli</i> O121:H19 96.1589           | A. Bhunia                      | -                                   |
| <i>E. coli</i> O45:H2 SJ7                 | A. Bhunia                      | -                                   |
| <i>E. coli</i> O26:H11 00971              | A. Bhunia                      | -                                   |
| <i>E. coli</i> O145:H8 07865              | A. Bhunia                      | -                                   |
| <i>E. coli</i> O26:H11 93-3118            | A. Bhunia                      | -                                   |
| <i>E. coli</i> O145:NM 03.4699            | A. Bhunia                      | -                                   |
| <i>E. coli</i> O121:H19 SJ18              | A. Bhunia                      | -                                   |
| <i>E. coli</i> O26:H11 05-6544            | A. Bhunia                      | -                                   |
| <i>E. coli</i> O145:NM SJ23               | A. Bhunia                      | -                                   |
| <i>E. coli</i> O45:H2 96.3285             | A. Bhunia                      | -                                   |
| <i>E. coli</i> O26:H19 08023              | A. Bhunia                      | -                                   |
| <i>E. coli</i> O111:NM SJ13               | A. Bhunia                      | -                                   |

<sup>a</sup>Bacteria isolates were kindly provided from: D. Conner, Auburn University; J. Johnson, Food and Drug

Administration, Seattle, WA; P. Fratamico, USDA Agricultural Research Service, Eastern Regional Research Center, Wyndmoor, PA; R. Sanderson, Indiana State Department of Health, Indianapolis, IN; S. Weagant, Food and Drug Administration Laboratory, Bothel, WA; National Veterinary State Laboratory, Ames, IA; P. Feng, Food and Drug Administration, College Park, MD; A. Bhunia, Purdue University; R. Johnson, Health of Animals Laboratory, Canada and B. Blais, Agri-Food Canada.

<sup>b</sup> Phage  $\Phi$ V10 is specific for *E.coli* O157:H7. All of the *E.coli* O157:H7 isolates formed plaques (+) when infected by phage  $\Phi$ V10. While no plaques (-) were detected when non-*E.coli* O157:H7 isolates were tested.

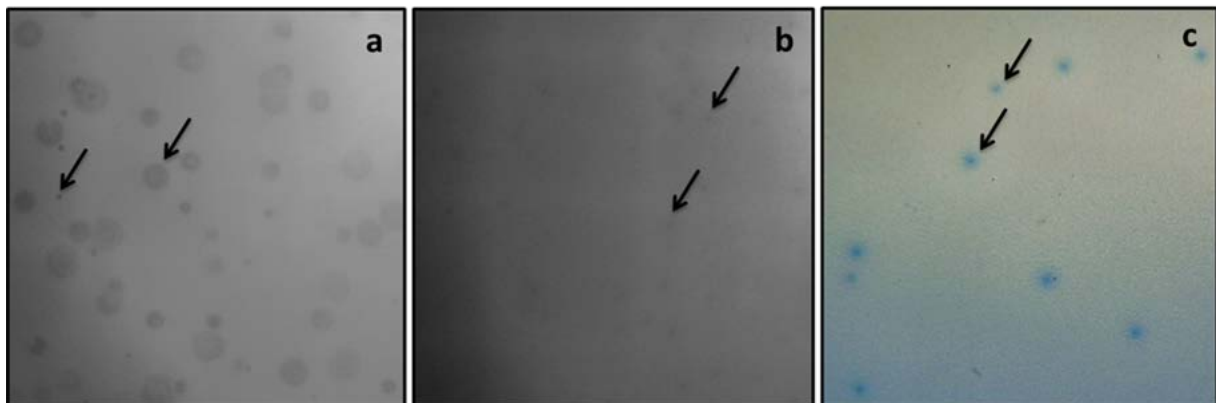

**Figure S1.** Phenotypic characteristics of phage  $\Phi$ V10 plaques. (a) Plaques of wild type phage  $\Phi$ V10 formed in LB top agar; (b) Plaques of phage  $\Phi$ V10 $nluc$  detected in LB top agar; (c) Plaques of phage  $\Phi$ V10 $nluc$  in LB top agar. The arrows show the representatives of the detected plaques.

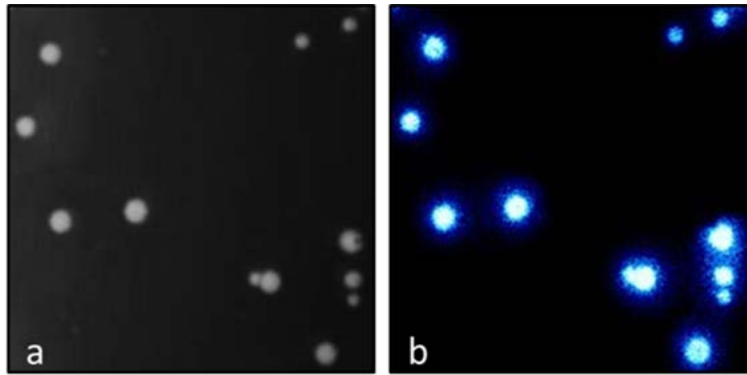

**Figure S2.** Bioluminescence emission of phage  $\Phi V10nluc$  lysogens. (a) Lysogens were grown in LB-Kan plates after phage  $\Phi V10nluc$  infected *E.coli* O157:H7 C7927 (ambient light); (b) Bioluminescence emission of lysogens (the same colonies as panel a in dark) after addition of Nanoluc-Glo substrate.
